# Supplementary material for: Enough to Feed Ourselves!—Food Plants in Bulgarian Rural Home Gardens
Source: MDPI journal article supplement (doi:10.3390/plants10112520), 2021-11-19
Supplement: s1 [file s1]

**Table S1.** Food, medicinal and fodder plants cultivated in Bulgarian rural home gardens.

| Plant taxon                                                      | Family         | Vernacular Name                     | Part Used                     | Consumption                                           | Preservation <sup>1</sup> | Provinces <sup>2</sup>     | Occurrence <sup>3</sup> |
|------------------------------------------------------------------|----------------|-------------------------------------|-------------------------------|-------------------------------------------------------|---------------------------|----------------------------|-------------------------|
| <i>Abelmoschus esculentus</i> (L.) Moench                        | Malvaceae      | bamya, bamnya                       | fruits                        | stews and pickles                                     | D, F, FR                  | Hs, Pd                     | 8                       |
| ** <i>Actinidia deliciosa</i> (A.Chev.) C.F.Liang & A.R.Ferguson | Actinidiaceae  | kivi                                | fruits                        | fresh, spirits                                        |                           | Bl, Hs, Mn, Sm             | 11                      |
| <i>Agastache foeniculum</i> (Pursh) Kuntze                       | Lamiaceae      | lophant                             | herbage                       | herbal tea                                            | D                         | Hs                         | 2                       |
| <i>Allium ampeloprasum</i> L.                                    | Amaryllidaceae | praz                                | pseudostem, leaves            | raw or cooked, pastries, flavoring for cured sausages |                           | Bl, Hs, Mn                 | 15                      |
| <i>Allium cepa</i> L. <i>Aggregatum</i> Group                    | Amaryllidaceae | bogat luk                           | bulb, leaves                  | raw or cooked                                         |                           | Lv, Mn, Pd                 | 3                       |
| <i>Allium cepa</i> L.                                            |                |                                     |                               |                                                       |                           |                            |                         |
| <i>Cepa</i> Group                                                | Amaryllidaceae | luk, arpadzhikov luk, kromid, sugan | bulb, leaves                  | raw or cooked, pastries, preserves                    | P                         | All                        | 65                      |
| <i>Allium cepa</i> L. <i>Proliferum</i> Group                    | Amaryllidaceae | jivorazhdasht luk                   | bulb, leaves                  | raw or cooked                                         |                           | Mn, Pd, Vr                 | 3                       |
| <i>Allium sativum</i> L.                                         | Amaryllidaceae | chesan, byal luk                    | bulb                          | raw or cooked, preserves                              | P                         | All                        | 65                      |
| <i>Allium schoenoprasum</i> L.                                   | Amaryllidaceae | rezanets                            | pseudostem, leaves            | salads                                                |                           | Sm                         | 1                       |
| <i>Allium tuberosum</i> Rottler ex Spreng.                       | Amaryllidaceae | chesnova treva                      | pseudostem, leaves            | raw or cooked                                         |                           | Mn                         | 3                       |
| <i>Allium ursinum</i> L.                                         | Amaryllidaceae | levurda, div chesan                 | leaves                        | raw or cooked, pickles, alcohol extracts              |                           | Mn                         | 2                       |
| <i>Allium vineale</i> L.                                         | Amaryllidaceae | div luk                             | leaves                        | salads                                                |                           | Sm                         | 1                       |
| <i>Anethum graveolens</i> L.                                     | Apiaceae       | kopar                               | leaves, inflorescences, seeds | flavoring of various dishes and preserves             | D, P, F, FR               | Bl, Hs, Lv, Mn, Pd, Sm, Vr | 27                      |
| * <i>Anthriscus cerefolium</i> (L.) Hoffm.                       | Apiaceae       |                                     | herbage                       | herbal tea                                            |                           | Sm                         | 1                       |
| <i>Apium graveolens</i> L.                                       | Apiaceae       | tselina, kereviz, kirviz            | herbage, taproot              | raw or cooked, preserves                              | D, F, FR                  | Bl, Hs, Lv, Pd, Sm, Vr     | 17                      |
| <i>Arachis hypogaea</i> L.                                       | Fabaceae       | fustuk                              | seeds                         | rosted, snack, dessert                                | D                         | Pd, Bl                     | 2                       |
| <i>Armoracia rusticana</i> P.Gaertn., B.Mey. & Scherb.           | Brassicaceae   | hryan                               | rhizomes                      | preserves                                             | F, FR                     | Bl, Hs, Lv, Mn, Pd         | 16                      |
| <i>Aronia melanocarpa</i> (Michx.) Elliott                       | Rosaceae       | aronia                              | fruits                        | jam, compote, beverages                               | P, F                      | Bl, Hs, Lv, Mn, Pd, Sm     | 19                      |
| * <i>Artemisia absinthium</i> L.                                 | Asteraceae     | pelin                               | herbage                       | flavoring for wines                                   |                           | Bl, Hs                     | 2                       |
| <i>Artemisia pontica</i> L.                                      | Asteraceae     | pelin, kadunska kalka, piy pak      | herbage                       | flavoring for wines and                               |                           | Bl, Hs, Lv,                | 9                       |

|                                               |                |                                   |                 |                                                 |             |                        |    |
|-----------------------------------------------|----------------|-----------------------------------|-----------------|-------------------------------------------------|-------------|------------------------|----|
|                                               |                |                                   |                 | spirits                                         |             | Mn, Pd                 |    |
| Asparagus officinalis L.                      | Asparagaceae   | asperzha                          | young shoots    | cooked                                          |             | Bl, Mn                 |    |
| Atriplex hortensis L.                         | Chenopodiaceae | loboda                            | leaves          | cooked                                          |             | BL, Lv, Sm             |    |
| Beta vulgaris L. ssp. vulgaris                |                |                                   |                 |                                                 |             |                        |    |
| Altissima Group                               | Amaranthaceae  | zaharno tsveklo                   | taproot         | preserves (madzhun, petmez)                     | P           | Bl, Hs, Bd, Sm         | 7  |
| Beta vulgaris L.                              |                |                                   |                 |                                                 |             |                        |    |
| ssp. vulgaris                                 |                |                                   |                 |                                                 |             |                        |    |
| Conditiva Group                               | Amaranthaceae  | cherveno tsveklo, chekane, kochan | leaves, taproot | raw and cooked, pastries, pickles               | F           | Bl, Hs, Lv, Mn, Pd, Sm | 19 |
| Beta vulgaris L. ssp. vulgaris Cicla Group    | Amaranthaceae  | zimen spanak, mangold             | leaves          | cooked                                          | P           | Hs, Lv, Mn, Sm         | 6  |
| Beta vulgaris L. ssp. vulgaris Vulgaris Group | Amaranthaceae  | furazhno tsveklo                  | leaves, taproot | cooked, pastries, fodder                        |             | Bl, Hs, Sm             | 5  |
| Brassica napus L. Napobrassica Group          | Brassicaceae   | kotchani, kotchen                 | leaves, stem    | flavoring for bean stews                        |             | Sm                     | 1  |
| Brassica oleracea L.                          |                |                                   |                 |                                                 |             |                        |    |
| var. italica Plenc                            | Brassicaceae   | broccoli                          | inflorescence   | raw or cooked                                   | FR          | Bl, Sm                 | 2  |
| Brassica oleracea var. capitata L.            | Brassicaceae   | glavesto zeles                    | leaves          | raw and cooked, pickles                         | P, F        | Bl, Hs, Lv, Pd, Sm     | 19 |
| Brassica oleracea var. gongylodes L.          | Brassicaceae   | alabash, kotchan, kholrabi        | stem            | raw or cooked, pickles                          |             | Bl, Pd, Sm             | 8  |
| Calendula officinalis L.                      | Asteraceae     | neven                             | flowers         | herbal tea, oil extract                         | D           | Hs, Lv, Mn, Sm         | 5  |
| *Capsella bursa-pastoris (L.) Medik.          | Brassicaceae   | ovcharska torbichka, nekutche     | herbage         | pastries                                        | FR          | Hs                     | 1  |
| Capsicum annuum L. Cultivars                  | Solanaceae     | chushka, piper, puper, kapitsi    | fruits          | raw, cooked or roasted, pickles, paprika powder | D, P, F, FR | All                    | 65 |
| Capsicum baccatum var. pendulum L.            | Solanaceae     | kambanki                          | fruits          | flavoring for various dishes                    | D           | Hs                     | 1  |
| Castanea sativa Mill.                         | Fagaceae       | kesten                            | seeds           | cooked, snacks, preserved                       | D, P        | Bl                     | 1  |
| Cicer arietinum L.                            | Fabaceae       | nakhut, lakhut                    | seeds           | cooked or roasted (snack)                       | D           | Hs                     | 2  |
| Citrullus lanatus (Thunb.) Matsum. & Nakai    | Cucurbitaceae  | dinya, karpuz, lyubenitsa         | fruits          | fresh, preserves                                | P           | Bl, Hs, Pd             | 10 |
| **Citrus limon (L.) Osbeck                    | Rutaceae       | limon                             | fruits          | fresh, flavoring for preserves                  | P           | Bl, Hs, Lv, Pd, Sm     | 17 |

|                                       |               |                          |                               |                                                              |         |                            |    |
|---------------------------------------|---------------|--------------------------|-------------------------------|--------------------------------------------------------------|---------|----------------------------|----|
| Coriandrum sativum L.                 | Apiaceae      | gudecha merudiya         | seeds                         | flavoring for cured sausages                                 | D       | Bl                         | 1  |
| Cornus mas L.                         | Cornaceae     | dryan                    | fruits                        | row, preserves, spirits                                      | D, P    | Hs, Lv, Pd, Sm             | 15 |
| Corylus avellana L.                   | Betulaceae    | leska                    | seeds                         | snack, desserts                                              | D       | Bl, Hs, Lv, Mn, Sm         | 9  |
| Corylus colurna L.                    | Betulaceae    | turska leska             | seeds                         | snack, desserts                                              | D       | Mn                         | 1  |
| Corylus maxima Mill.                  | Betulaceae    | tsarigradska leska       | seeds                         | snack, desserts                                              | D       | Hs                         | 1  |
| Cucumis melo L.                       | Cucurbitaceae | pupesh, kaun, pipon      | fruits                        | fresh, preserves, spirits                                    | P       | Hs                         | 7  |
| Cucumis sativus L. Cultivars          | Cucurbitaceae | krastavitsa              | fruits                        | fresh, preserves, pickles                                    | P, F    | All                        | 65 |
| Cucurbita maxima Duchesne             | Cucurbitaceae | byala tikva              | fruits, flowers, stem tops    | raw and cooked, pastries, desserts, preserves, snack (seeds) | P       | Bl, Hs, Mn, Sm             | 12 |
| Cucurbita moschata Duchesne           | Cucurbitaceae | tikva tsigulka           | fruits, flowers, stem tops    | raw and cooked, pastries, desserts, preserves, snack (seeds) | P       | Bl, Hs, Sm                 | 15 |
| Cucurbita pepo L.                     | Cucurbitaceae | tikvichka, balka         | fruits, flowers, stem tops    | raw and cooked, preserves, spirits                           | P       | All                        | 64 |
| Cucurbita pepo L. var. styriaca       | Cucurbitaceae | tikva, svinska tikva     | fruits, flowers, stem tops    | raw and cooked, pastries, desserts, preserves, snack (seeds) | P       | Bl, Hs, Lv, Pd, Sm         | 10 |
| Cydonia oblonga Mill.                 | Rosaceae      | dyulya, dunkya           | fruits                        | fresh, preserves, flavoring for pickles                      | P, F    | Bl, Hs, Lv, Mn, Pd, Sm, Vr | 23 |
| Daucus carota L.                      | Apiaceae      | morkov                   | taproot                       | raw and cooked, preserves, pickles                           | P, F    | Bl, Hs, Lv, Mn, Pd, Sm, Vr | 24 |
| **Diospyros kaki L.f.                 | Ebenaceae     | rayska yabalka           | fruits                        | raw, preserves                                               | P       | Bl, Hs, Pd                 | 5  |
| Elaeagnus angustifolia L.             | Elaeagnaceae  | brashlyanka, brashnyanka | fruits                        | raw (snack)                                                  |         | Hs                         | 2  |
| **Eriobotrya japonica (Thunb.) Lindl. | Rosaceae      | yaponska mushmula        | fruits                        | raw, preserves                                               | P       | Bl, Hs, Mn                 | 7  |
| Eruca vesicaria (L.) Cav.             | Brassicaceae  | rukola                   | leaves                        | raw                                                          |         | Lv, Mn                     | 3  |
| **Ficus carica L.                     | Moraceae      | smokinya, smokva         | fruits                        | fresh, preserves, spirits                                    | D, P    | All                        | 27 |
| Foeniculum vulgare Mill.              | Apiaceae      | div kopar, rezene        | leaves, inflorescences, seeds | raw, pickles, flavoring for cured sausages                   | D, P, F | Lv, Mn, Pd                 | 6  |
| *Fragaria vesca L.                    | Rosaceae      | diva yagoda              | fruits                        | fresh, preserves, herbal                                     | D, P    | Lv, Mn, Sm                 | 4  |

| tea                                                              |                |                         |                     |                                                                     |         |                                  |    |
|------------------------------------------------------------------|----------------|-------------------------|---------------------|---------------------------------------------------------------------|---------|----------------------------------|----|
| Fragaria x ananassa (Duchesne ex Weston)<br>Duchesne ex Rozier   | Rosaceae       | yagoda                  | fruit               | fresh, preserves                                                    | P, FR   | Bl, Hs, Lv,<br>Mn, Pd,<br>Sm, Vr | 37 |
| Galanthus elwesii Hook.f.                                        | Amaryllidaceae | kokitche                | leaves, flowers     | alcoholic extract                                                   |         | Hs                               | 1  |
| Geranium macrorrhizum L.                                         | Geraniaceae    | zdravets                | leaves              | fresh                                                               |         | Hs, Mn, Sm                       | 3  |
| Helianthus annuus L.                                             | Asteraceae     | slanchogled             | seeds               | snack (roasted)                                                     | D       | Hs                               | 2  |
| Helianthus tuberosus L.                                          | Asteraceae     | zemna yabalka, guliya   | tubers              | raw, pickles                                                        | F       | Bl, Hs, Lv,<br>Sm, Vr            | 7  |
| Juglans regia L.                                                 | Juglandaceae   | orekh                   | seeds, young fruits | snack, desserts,<br>preserves and alcohol<br>extract (young fruits) | D, P    | Bl, Hs, Lv,<br>Mn, Sm, Vr        | 14 |
| Lactuca sativa var. crispa (L.) Schübl. &<br>G.Martens Cultivars | Asteraceae     | salata, kadrava marulya | leaves              | raw (salads)                                                        |         | All                              | 40 |
| Lactuca sativa var. longifolia (Lam.) Alef.<br>Cultivars         | Asteraceae     | marulya, byala marulya  | leaves              | raw (salads), pastries                                              |         | All                              | 45 |
| Lathyrus sativus L.                                              | Fabaceae       | star grakh              | seeds               | cooked                                                              | D       | Hs                               | 1  |
| **Laurus nobilis L.                                              | Lauraceae      | dafina                  | leaves              | flavoring for meat and<br>vegetable dishes                          | D       | Bl, Hs, Lv                       | 9  |
| Lavandula angustifolia Mill.                                     | Lamiaceae      | lavandula               | herbage             | herbal tea                                                          | D       | Hs, Lv                           | 2  |
| Lens culinaris Medik.                                            | Fabaceae       | leshta                  | seeds               | cooked                                                              | D       | Hs                               | 2  |
| Levisticum officinale W.D.J.Koch                                 | Apiaceae       | devesil, lyushtyan      | leaves              | flavoring of various<br>dishes                                      | D, FR   | Hs, Lv, Mn,<br>Pv, Sm, Vr        | 16 |
| Lilium candidum L.                                               | Liliaceae      | byal krem, zambak       | flowers             | oil extract                                                         |         | Hs                               | 1  |
| Lycium barbarum L.                                               | Solanaceae     | merdzhan, gojiberry     | fruits              | raw                                                                 | D, FR   | Bl, Hs, Lv,<br>Mn, Pd, Sm        | 11 |
| Lycopersicon esculentum Mill. Cultivars                          | Solanaceae     | domat                   | fruits              | raw or cooked,<br>preserves, pickles                                | D, P, F | All                              | 65 |
| Malus domestica Borkh.                                           | Rosaceae       | yabalka                 | fruits              | raw or cooked,<br>preserves, vinegar,<br>pastries, spirits          | D, P, F | All                              | 48 |
| Medicago sativa L.                                               | Fabaceae       | lyutserna               | herbage             | fodder                                                              | D       | Hs, Sm                           | 4  |
| Melissa officinalis L.                                           | Lamiaceae      | matochina               | herbage             | herbal tea, beverages,<br>syrup                                     | D, P    | Bl, Hs, Lv,<br>Mn, Pd, Sm        | 17 |
| Mentha spicata L.                                                | Lamiaceae      | gyozum, dzhodzhen       | herbage             | flavoring for various                                               | D, FR   | All                              | 47 |

|                                                            |                |                                           |                |                                                                  |       |                           |    |
|------------------------------------------------------------|----------------|-------------------------------------------|----------------|------------------------------------------------------------------|-------|---------------------------|----|
|                                                            |                |                                           |                | dishes, pastries                                                 |       |                           |    |
| Mentha x piperita L.                                       | Lamiaceae      | mentha                                    | herbage        | herbal tea, beverages,<br>syrup                                  | D     | Bl, Hs, Lv,<br>Mn, Pd, Sm | 15 |
| Mespilus germanica L.                                      | Rosaceae       | mushmula                                  | fruits, timber | raw, preserves,<br>flavoring and coloring<br>of spirits (timber) | P     | Bl, Hs                    | 2  |
| Morus alba L.                                              | Moraceae       | chernitsa, byala duda                     | fruits         | raw, preserves                                                   | P     | Hs, Lv                    | 5  |
| **Morus nigra L.                                           | Moraceae       | chernitsa, cherna duda                    | fruits         | raw, preserves                                                   | P     | Hs                        | 1  |
| Nectaroscordum siculum subsp.<br>bulgaricum (Janka) Stearn | Amaryllidaceae | samardala                                 | leaves         | herbal salt                                                      | D     | Mn                        | 1  |
| Ocimum basilicum L.                                        | Lamiaceae      | bosilek                                   | herbage        | herbal tea, flavoring for<br>salads and pizza                    | D     | Bl, Hs, Lv, Pd,<br>Sm, Vr | 19 |
| Ocimum minimum L.                                          | Lamiaceae      | grutski bosilek                           | herbage        | herbal tea, flavoring for<br>salads and pizza                    |       | Bl, Hs, Sm                | 4  |
| **Origanum vulgare subsp. hirtum (Link)<br>Ietsw.          | Lamiaceae      | byal rigan, visoka rigan                  | herbage        | flavoring for various<br>dishes, meat products<br>and preserves  | D     | Hs, Lv, Sm                | 12 |
| *Papaver rhoeas L.                                         | Papaveraceae   | kadunka, bulitsa, mak, machech            | herbage        | pastries                                                         | FR    | Hs                        | 2  |
| Papaver somniferum L.                                      | Papaveraceae   | mak                                       | seeds          | pastries                                                         | D     | Hs, Lv, Mn,<br>Sm, Vr     | 6  |
| Pastinaca sativa L.                                        | Apiaceae       | pashtarnak                                | taproot        | flavoring for various<br>dishes                                  | FR    | Hs, Lv, Pd,<br>Sm         | 6  |
| Pelargonium roseum Willd.                                  | Geraniaceae    | indrishe                                  | leaves         | flavoring for fruit<br>preserves, herbal tea                     |       | Bl, Hs, Lv, Pd            | 10 |
| Petroselinum crispum (Mill.) Fuss                          | Apiaceae       | magdanoz, merudiya                        | herbage        | flavoring for various<br>dishes and pickles                      | D, FR | All                       | 65 |
| Phaseolus coccineus L.                                     | Fabaceae       | fasulevitsa, bivolar, Smilyanski<br>fasul | seeds          | cooked                                                           | D     | Bl, Hs, Lv, Sm            | 14 |
| Phaseolus lunatus L.                                       | Fabaceae       | popski fasul                              | seeds          | cooked                                                           | D     | Pd                        | 1  |
| Phaseolus vulgaris L.                                      | Fabaceae       | fasul, bob, kapichki                      | seeds, pods    | cooked                                                           | D     | All                       | 44 |
| Physalis peruviana L.                                      | Solanaceae     | grutska smokinya                          | fruits         | fresh                                                            |       | Bl                        | 1  |
| *Phytolacca americana L.                                   | Phytolaccaceae | butima, pishalo                           | leaves         | cooked (sarmi)                                                   | D     | Bl                        | 1  |
| Pisum sativum L.                                           | Fabaceae       | grakh                                     | seeds          | cooked, preserves                                                | P, FR | Hs, Lv                    | 2  |
| *Portulaca oleracea L.                                     | Portulacaceae  | tutchenitsa, semzelek                     | herbage        | raw or cooked, pastries                                          |       | Bl, Hs                    | 4  |
| Prunus armeniaca L.                                        | Rosaceae       | kaysiya                                   | fruits         | fresh, desserts,                                                 | D, P  | Bl, Hs, Lv,               | 16 |

|                                                            |                 |                                        |                |                                        |       |                                  |    |
|------------------------------------------------------------|-----------------|----------------------------------------|----------------|----------------------------------------|-------|----------------------------------|----|
|                                                            |                 |                                        |                | preserves, spirits                     |       | Mn, Pd                           |    |
| Prunus avium (L.) L.                                       | Rosaceae        | cheresha                               | fruits, leaves | fresh, desserts,<br>preserves, spirits | P     | All                              | 31 |
| Prunus cerasifera Ehrh.                                    | Rosaceae        | dzhanka, sliva                         | fruits         | fresh, preserves, pickles,<br>spirits  | P, F  | Bl, Hs, Lv,<br>Sm, Vr            | 9  |
| Prunus cerasus L.                                          | Rosaceae        | vishnya                                | fruits, leaves | fresh, desserts,<br>preserves, liquer  | P     | Bl, Hs, Lv,<br>Mn, Sm            | 11 |
| Prunus cerasus L. x P. avium (L.) L.                       | Rosaceae        | vishnap                                | fruits         | fresh, desserts, preserves             | P     | Hs                               | 1  |
| Prunus domestica L.                                        | Rosaceae        | sliva, sinya sliva, chernoslivka       | fruits         | fresh, desserts,<br>preserves, spirits | D, P  | Bl, Hs, Lv, Pd,<br>Sm            | 24 |
| **Prunus dulcis (Mill.) D.A.Webb                           | Rosaceae        | badem                                  | seeds          | fresh, desserts                        | D     | Hs, Sm                           | 7  |
| Prunus persica (L.) Batsch                                 | Rosaceae        | praskova                               | fruits         | fresh, desserts, preserves             | P     | Bl, Hs, Lv,<br>Mn, Pd, Sm,<br>Vr | 35 |
| Prunus persica (L.) Batsch var. nectarina<br>(Aiton) Maxim | Rosaceae        | nectarina                              | fruits         | fresh, desserts, preserves             | P     | Sm                               | 1  |
| **Punica granatum L.                                       | Rosaceae        | nar, kalinka                           | fruits         | fresh, desserts                        | P     | Bl, Hs, Pd                       | 6  |
| Pyrus communis L.                                          | Rosaceae        | krusha                                 | fruits         | fresh, desserts,<br>preserves, spirits | D, P  | Bl, Hs, Lv,<br>Mn, Pd,<br>Sm, Vr | 37 |
| *Ranunculus arvensis L.                                    | Ranunculaceae   | pateshko krache                        | herbage        | pastries                               |       | Hs                               | 1  |
| Raphanus raphanistrum subsp. sativus (L.)<br>Domin         | Brassicaceae    | repichka                               | taproot        | raw (salads)                           |       | All                              | 64 |
| Ribes aureum Pursh                                         | Grossulariaceae | zhulto frensko grozde, zlaten<br>kasis | fruits         | fresh, desserts, preserves             | P, FR | Hs, Pd                           | 6  |
| Ribes nigrum L.                                            | Grossulariaceae | kasis                                  | fruits         | fresh, desserts,<br>preserves, spirits | P, FR | Bl, Lv, Mn,<br>Sm                | 4  |
| Ribes rubrum L.                                            | Grossulariaceae | frensko grozde                         | fruits         | fresh, desserts, preserves             | P, FR | Bl, Hs, Lv,<br>Mn, Pd, Sm        | 17 |
| Ribes uva-crispa L.                                        | Grossulariaceae | tsarigradsko grozde                    | fruits         | fresh, desserts, preserves             | P, FR | Hs, Lv, Mn                       | 3  |
| Rosa sp. Cultivars                                         | Rosaceae        | rosa, gyul, trendafil                  | flowers        | herbal tea, preserves                  | D, P  | Hs, Lv                           | 2  |
| **Rosmarinus officinalis L.                                | Lamiaceae       | rozmarin                               | leaves         | flavoring for meat                     | D     | Hs                               | 2  |
| Rubus caesius L.                                           | Rosaceae        | kapina                                 | fruits         | fresh, desserts, preserves             | P, FR | Bl, Hs, Lv,<br>Mn, Pd, Sm,<br>Vr | 13 |

|                                |                 |                            |                 |                                                 |         |                |    |
|--------------------------------|-----------------|----------------------------|-----------------|-------------------------------------------------|---------|----------------|----|
| Rubus idaeus L.                | Rosaceae        | malina                     | fruits          | fresh, desserts, preserves                      | P, FR   | All            | 31 |
| Rubus illecebrosus Focke       | Rosaceae        | yagodomalina               | fruits          | fresh, desserts                                 | P, FR   | Lv             | 1  |
| Rumex acetosa L.               | Polygonaceae    | kiselets, kiselek          | leaves          | cooked, pastries                                | D       | Hs, Lv, Mn, Sm | 8  |
| *Rumex patientia L.            | Polygonaceae    | lapad                      | leaves          | cooked, pastries                                |         | Hs, Mn         | 4  |
| Salvia officinalis L.          | Lamiaceae       | gradinski chai             | leaves          | herbal tea                                      | D       | Bl, Hs, Lv, Sm | 11 |
| *Sambucus nigra L.             | Adoxaceae       | baz, buz                   | flowers, fruits | herbal tea, syrup, preserves, beverages         | D, P, F | Hs             | 1  |
| Satureja hortensis L.          | Lamiaceae       | chubritsa, chubrika        | herbage         | flavoring for various dishes and cured sausages | D       | All            | 28 |
| Sideritis scardica Gris.       | Lamiaceae       | pirinski chai              | herbage         | herbal tea                                      | D       | Hs, Sm         | 4  |
| *Silybum marianum (L.) Gaertn. | Asteraceae      | byal trun                  | fruits          | herbal tea                                      |         | Mn             | 1  |
| Solanum melongena L.           | Solanaceae      | patladzhan, sin domat      | fruits          | cooked or roasted, preserves                    | P       | Bl, Hs, Pd, Pv | 13 |
| Solanum tuberosum L.           | Solanaceae      | kartof, kompir, baraboshki | tubers          | cooked or roasted                               |         | All            |    |
| Spinacia oleracea L.           | Amaranthaceae   | spanak                     | leaves          | raw or cooked                                   | FR      | Hs, Lv, Sm     | 13 |
| *Stellaria media (L.) Vill.    | Caryophyllaceae | zhabni chrevtsa            | herbage         | pastries                                        | FR      | Hs             | 1  |
| Tagetes erecta L.              | Asteraceae      | turta, fundi               | flowers         | herbal tea                                      | D       | Bl, Hs         | 2  |
| Tanacetum balsamita L.         | Asteraceae      | kaloferche, kalofer        | leaves          | flavoring for various dishes                    |         | Lv             | 1  |
| Thymus sp.                     | Lamiaceae       | mashterka bilka            | herbage         | herbal tea                                      | D       | Hs, Mn, Sm     |    |
| Thymus vulgaris L.             | Lamiaceae       | mashterka podpravka        | herbage         | flavoring for various dishes                    | D       | Pd, Sm         | 2  |
| Tilia tomentosa Moench         | Tiliaceae       | lipa                       | flowers         | herbal tea                                      | D       | Hs, Lv, Mn, Sm | 5  |
| Trigonella caerulea (L.) Ser.  | Fabaceae        | smindukh, smindol, kvachka | herbage, seeds  | flavoring for various dishes, herbal salt       | D       | Hs, Lv, Pd     | 3  |
| *Urtica dioica L.              | Urticaceae      | kopriva                    | herbage         | cooked                                          | D       | Hs, Mn         | 3  |
| Vaccinium corymbosum L.        | Ericaceae       | amerikanska borovinka      | fruits          | fresh                                           | Fr      | Mn             | 1  |
| Valeriana officinalis L.       | Caprifoliaceae  | valeriana                  | rhizomes        | herbal tea, alcohol extract                     | D       | Lv             | 1  |

\* - Semi-cultivated species'; \*\*Mediterranean or subtropical taxa. <sup>1</sup>Preservation modes: D – drying; P – preserve (sterilized, marinated or boiled); F – fermented; FR – frozen. <sup>2</sup>Province: Bl – Blagoevgrad; Hs – Haskovo; Lv – Lovech; Mn – Montana; Pv – Pleven; Pd – Plovdiv; Sm – Smolyan; Vr – Vratsa. <sup>3</sup>Occurrence – Number of gardens (N = 65).

**Table S2.** Preference to crop groups as parts of the food growing area (FGA) across studied home gardens.

| Crop group                                    | 0 FGA <sup>1</sup> |                  | < 1/5 FGA |     | 1/5 - 1/3 FGA |     | > 1/3 FGA |     |
|-----------------------------------------------|--------------------|------------------|-----------|-----|---------------|-----|-----------|-----|
|                                               | LL <sup>2</sup>    | SMM <sup>3</sup> | LL        | SMM | LL            | SMM | LL        | SMM |
| Fruiting vegetables*                          | 0                  | 0                | 1         | 5   | 26            | 19  | 5         | 9   |
| Bulbous vegetables <sup>NS</sup>              | 0                  | 0                | 17        | 18  | 13            | 12  | 2         | 2   |
| Herbs and Spices <sup>NS</sup>                | 0                  | 0                | 30        | 33  | 1             | 0   | 0         | 0   |
| Leaf, stalk and stem vegetables <sup>NS</sup> | 0                  | 1                | 30        | 31  | 1             | 1   | 0         | 0   |
| Root & Tuber vegetables <sup>NS</sup>         | 3                  | 1                | 21        | 25  | 5             | 7   | 0         | 0   |
| Legumes <sup>NS</sup>                         | 4                  | 5                | 25        | 20  | 2             | 6   | 0         | 0   |
| Berries & Small fruits <sup>NS</sup>          | 4                  | 4                | 26        | 24  | 2             | 4   | 0         | 0   |
| Cereals (Corn) <sup>NS</sup>                  | 19a                | 16               | 9         | 13  | 0             | 3   | 0         | 0   |
| Animal fodder <sup>NS</sup>                   | 28                 | 29               | 2         | 1   | 2             | 3   | 0         | 0   |

<sup>1</sup> Parts of food growing area (FGA) occupied by each crop group; <sup>2</sup> Lowland settlements (LL), n = 31;

<sup>3</sup> Semi-mountainous and mountainous settlements (SMM), n = 33; \*Fisher's exact tests *p*-values ≤ 0.05,

NS – not significant.
